# Supplementary material
Source: Royal Society of Chemistry journal article supplement (https://www.rsc.org/suppdata/p2/1999/801/808818g.doc)
Supplement: Supplementary file 1 [file 808818g.doc]

**Supplementary Material**

**Molecular structures of the compounds in xyz g94 format**

--------------------------------------------------

Thioamide 1 gas-phase

--------------------------------------------------

B3LYP/6-31G(d)

C,0,-1.4868154078,-1.1900802846,0.0001769909

C,0,-2.2423993115,-0.0523376092,0.0001226807

C,0,-1.5608094883,1.196834342,0.0000884216

C,0,-0.1906179579,1.2529161326,-0.000110249

C,0,0.6147221553,0.0649281418,-0.0010056828

N,0,-0.1263315245,-1.1100121323,-0.0002225276

S,0,2.292356705,0.0050718043,0.0002848238

H,0,0.4294030452,-1.9593271337,-0.0000730791

H,0,0.3361575853,2.1997151387,0.0001856776

H,0,-1.9027022657,-2.1913507326,0.0005079679

H,0,-3.3238691215,-0.1120014351,0.0003968293

H,0,-2.1368557904,2.1183358853,0.0003501492

HF/6-311+G(2d,p)

C,0,-1.4729202971,-1.1708667894,0.0001575598

C,0,-2.2203723555,-0.0590802888,0.0002444147

C,0,-1.5353330907,1.1891382991,0.0001730518

C,0,-0.188972407,1.245639404,0.0000259034

C,0,0.5970189906,0.0504180821,-0.0000588683

N,0,-0.1205871009,-1.0957156356,0.0000111077

S,0,2.2684328518,0.0044748088,-0.0002526319

H,0,0.415382203,-1.9353145425,-0.0000522572

H,0,0.3365499887,2.1780396847,-0.0000308624

H,0,-1.8854371689,-2.1604257676,0.0001974481

H,0,-3.2895315887,-0.1163507323,0.0003604847

H,0,-2.1043043998,2.1009716243,0.000237175

B3LYP/6-311+G(2d,p)

C,0,-1.4840047669,-1.1840594776,0.0001584036

C,0,-2.2345288781,-0.0499465744,0.0002450558

C,0,-1.5521385664,1.1945324052,0.0001740318

C,0,-0.1877447237,1.2484338879,0.000023339

C,0,0.6113811345,0.0619974744,-0.0000687547

N,0,-0.1272568094,-1.1090772887,0.0000088426

S,0,2.2844522178,0.0048032606,-0.0002482946

H,0,0.4249595408,-1.9578385705,-0.000054649

H,0,0.3382565837,2.1923896596,-0.0000317895

H,0,-1.904218734,-2.1805690044,0.0002006053

H,0,-3.3129970479,-0.1082369172,0.0003631621

H,0,-2.1242233592,2.1151973912,0.0002410326

MP2/6-311+G(2d,p)

C,0,-1.4839371103,-1.1891832911,0.0001587631

C,0,-2.2372733869,-0.0476830344,0.0002451465

C,0,-1.5581411502,1.1959666905,0.0001748513

C,0,-0.1859222254,1.2453186722,0.0000239486

C,0,0.6184874371,0.060871653,-0.0000697397

N,0,-0.1265677599,-1.1053530034,0.0000093425

S,0,2.2839060979,0.0056682709,-0.0002491154

H,0,0.4293951764,-1.9563483329,-0.0000538758

H,0,0.3408891597,2.191988644,-0.0000300102

H,0,-1.9012374538,-2.1890212091,0.0002016168

H,0,-3.317435415,-0.1120613829,0.0003639038

H,0,-2.1274160995,2.1204768295,0.0002409945

MP2(full)/6-311+G(2d,p)

C,0,-1.4817925,-1.1872224324,0.0001584592

C,0,-2.2342381355,-0.0475387597,0.0002454028

C,0,-1.5561113498,1.1937972227,0.0001749237

C,0,-0.1860343011,1.2431830695,0.0000247615

C,0,0.6175775929,0.0610759893,-0.0000654627

N,0,-0.1264688289,-1.1036770259,0.0000104784

S,0,2.2810691392,0.005690581,-0.000251289

H,0,0.4291047872,-1.9539646069,-0.0000538889

H,0,0.3397539549,2.1896425062,-0.0000307829

H,0,-1.8988922183,-2.1864409188,0.0002001008

H,0,-3.3137627235,-0.1124415294,0.0003633918

H,0,-2.1244360639,2.1181238981,0.0002399472

--------------------------------------------------

Thioimidate 2a gas-phase

--------------------------------------------------

HF/6-31G(d)

C,0,-1.166647,-1.472691,0.000000

C,0,-0.021202,-2.242156,0.000000

C,0,1.199505,-1.582331,0.000000

C,0,1.220404,-0.203935,0.000000

C,0,0.000000,0.466559,0.000000

N,0,-1.162330,-0.148148,0.000000

H,0,2.145454,0.341460,0.000000

S,0,0.000715,2.244208,0.000000

H,0,-1.315410,2.381161,0.000000

H,0,-2.137503,-1.935597,0.000000

H,0,-0.081509,-3.314156,0.000000

H,0,2.121471,-2.135833,0.000000

B3LYP/6-31G(d)

C,0,-1.1752769228,-1.4888485256,0.

C,0,-0.0149848515,-2.2586294215,0.

C,0,1.2129730179,-1.591855612,0.

C,0,1.2307067363,-0.2021346588,0.

C,0,0.,0.4729622831,0.

N,0,-1.1810880057,-0.1481623525,0.

H,0,2.1655934562,0.349701717,0.

S,0,0.0003778227,2.2615824217,0.

H,0,-1.3433661508,2.3663146958,0.

H,0,-2.1555384115,-1.9621824611,0.

H,0,-0.0718755311,-3.3424008903,0.

H,0,2.1462496341,-2.1485797312,0.

HF/6-311+G(2d,p)

C,0,-1.1726762698,-1.4643305013,0.

C,0,-0.0344914955,-2.2374872647,0.

C,0,1.1866683282,-1.5843660125,0.

C,0,1.2139813482,-0.2107761293,0.

C,0,0.,0.4652159923,0.

N,0,-1.1614432307,-0.1421150157,0.

H,0,2.1408829147,0.3296446605,0.

S,0,0.0167352807,2.240093569,0.

H,0,-1.2997452316,2.3879674198,0.

H,0,-2.1445809767,-1.9239643315,0.

H,0,-0.1005409253,-3.3080950354,0.

H,0,2.1054308764,-2.1417812148,0.

B3LYP/6-311+G(2d,p)

C,0,-1.1808642647,-1.4808529912,0.

C,0,-0.0273772294,-2.2516729907,0.

C,0,1.199052502,-1.5918975475,0.

C,0,1.2223338494,-0.2080715378,0.

C,0,0.,0.4730537923,0.

N,0,-1.1775994709,-0.1440904995,0.

H,0,2.1579473882,0.3368620564,0.

S,0,0.0155835409,2.2555816027,0.

H,0,-1.3223067819,2.3713056606,0.

H,0,-2.1600247965,-1.9494030178,0.

H,0,-0.0882599231,-3.3322012942,0.

H,0,2.1276346122,-2.1505879027,0.

MP2/6-311+G(2d,p)

C,0,-1.1789472345,-1.4869109243,0.

C,0,-0.0171846416,-2.252611981,0.

C,0,1.2108733853,-1.5901297508,0.

C,0,1.2239271283,-0.2013997606,0.

C,0,0.,0.4790093246,0.

N,0,-1.1851557635,-0.142411772,0.

H,0,2.158290009,0.3504917433,0.

S,0,0.0074766242,2.2537771337,0.

H,0,-1.3248774817,2.3388424509,0.

H,0,-2.1569002801,-1.9600682489,0.

H,0,-0.0755645344,-3.3353407263,0.

H,0,2.1435048192,-2.1452184009,0.

MP2(full)/6-311+G(2d,p)

C,0,-1.1765354382,-1.4857565661,0.

C,0,-0.0159585722,-2.2497665368,0.

C,0,1.2097982755,-1.5873971207,0.

C,0,1.2220942922,-0.2006310602,0.

C,0,0.,0.4785417145,0.

N,0,-1.1827482348,-0.1434145449,0.

H,0,2.1557613101,0.3512509345,0.

S,0,0.006129396,2.2513094998,0.

H,0,-1.3257977791,2.3346285743,0.

H,0,-2.153743522,-1.9593836727,0.

H,0,-0.07377605,-3.3319268118,0.

H,0,2.1423320058,-2.1415617906,0.

--------------------------------------------------

Thioimidate 2b gas-phase

--------------------------------------------------

HF/6-31G(d)

C,0,-1.450205,-1.201876,0.000103

C,0,-2.242725,-0.070817,0.000076

C,0,-1.606414,1.160402,0.000029

C,0,-0.227107,1.209807,-0.000051

C,0,0.466832,0.003514,-0.000203

N,0,-0.128495,-1.169601,-0.000048

H,0,0.292168,2.149086,-0.000004

S,0,2.241299,-0.094637,-0.000004

H,0,2.488256,1.207253,0.000348

H,0,-1.893712,-2.181643,0.000115

H,0,-3.313286,-0.151359,0.000134

H,0,-2.177030,2.071873,0.000085

B3LYP/6-31G(d)

C,0,-1.462992,-1.213559,0.000003

C,0,-2.259230,-0.070065,0.000084

C,0,-1.619615,1.170982,-0.000017

C,0,-0.229436,1.221245,-0.000062

C,0,0.472832,0.005956,-0.000193

N,0,-0.124825,-1.187216,-0.000111

H,0,0.293874,2.172023,-0.000050

S,0,2.258154,-0.095072,0.000095

H,0,2.491937,1.234335,-0.000168

H,0,-1.913944,-2.204289,0.000086

H,0,-3.341542,-0.149908,0.000309

H,0,-2.196369,2.092157,0.000197

HF/6-311+G(2d,p)

C,0,1.4488942925,-1.1983312356,0.0000853526

C,0,2.2382716505,-0.0693515009,0.0000494809

C,0,1.6011719464,1.1584658145,0.0000081386

C,0,0.226263009,1.2059451291,-0.0000451228

C,0,-0.4652580059,0.0018739538,-0.0001481151

N,0,0.1296134318,-1.1667796222,-0.0000253064

H,0,-0.2933712323,2.1438467923,-0.0000225284

S,0,-2.237421974,-0.0950274298,0.0000009989

H,0,-2.48462474,1.207880434,0.0002706763

H,0,1.8951994077,-2.1765867011,0.0000914004

H,0,3.3080397179,-0.1491794263,0.0000861433

H,0,2.1701570516,2.0703221672,0.0000370649

B3LYP/6-311+G(2d,p)

C,0,-1.4628370248,-1.2090064792,0.0000589723

C,0,-2.2522550983,-0.067435993,0.0000413841

C,0,-1.6116665817,1.1682301925,0.0000052454

C,0,-0.2274594152,1.2154051939,-0.0000446269

C,0,0.472539399,0.0041420377,-0.0001404191

N,0,-0.128126888,-1.1820521346,-0.0000759685

H,0,0.2950432576,2.1629864194,-0.0000578032

S,0,2.2525219842,-0.0957732212,0.000041

H,0,2.4834201068,1.2279112576,0.0002010799

H,0,-1.9153180185,-2.1956493574,0.0000375872

H,0,-3.3317040934,-0.1445190003,0.0001015372

H,0,-2.1848324578,2.0879974503,0.0000700436

MP2-fc/6-311+G(2d,p)

C,0,1.4657125596,-1.2124530043,0.0000555643

C,0,2.253491023,-0.0647944742,0.0000302335

C,0,1.6132291079,1.1741290469,-0.0000011246

C,0,0.2241171878,1.2145621381,-0.0000349218

C,0,-0.4787067236,0.0035672408,-0.0001034557

N,0,0.1233250851,-1.1916804394,-0.0000194632

H,0,-0.3017231336,2.1632480239,-0.0000105661

S,0,-2.2507495049,-0.0932905517,0.0000088015

H,0,-2.457003436,1.2256394508,0.0001818679

H,0,1.9203561734,-2.1991650972,0.0000709881

H,0,3.3350382214,-0.1421389475,0.0000556226

H,0,2.1849897296,2.0967627894,0.0000197321

MP2(full)/6-311+G(2d,p)

C,0, 1.463910,-1.210851,0.000044

C,0,2.250623,-0.064873,0.000022

C,0,1.611214,1.172218,-0.000004

C,0,0.224099,1.212815,-0.000031

C,0,-0.478223,0.004103,-0.000084

N,0,0.123616,-1.189124,-0.000015

H,0,-0.301219,2.161087,-0.000012

S,0,-2.248176,-0.093573,0.000012

H,0,-2.455692,1.224636,0.000139

H,0,1.918456,-2.197099,0.000054

H,0,3.331555,-0.142437,0.000041

H,0,2.182660,2.094375,0.000012

--------------------------------------------------

--------------------------------------------------

Thioamide 1 liquid-phase

--------------------------------------------------

B3LYP/6-31G(d) SCIPCM e=46.68

C,0,-1.4892590267,-1.1882126968,0.000149959

C,0,-2.2437535951,-0.044964877,0.0002429007

C,0,-1.5635826427,1.1966539331,0.00016583

C,0,-0.1876323453,1.2467145223,0.0000043134

C,0,0.6020309429,0.0593906353,-0.0000950771

N,0,-0.1305489129,-1.1109506298,-0.0000130399

S,0,2.3018827155,0.0068496905,-0.0002128863

H,0,0.4039935001,-1.9749003141,-0.0000737373

H,0,0.3370776241,2.1944084808,-0.0000495411

H,0,-1.9049949777,-2.1878467862,0.0001968136

H,0,-3.3248912494,-0.1027610651,0.000377493

H,0,-2.1342859539,2.120669944,0.000238877

B3LYP/6-31G(d) SCIPCM e=18.30

C,0,-1.4890522332,-1.1884775889,0.0001460066

C,0,-2.2435933554,-0.0454917943,0.0002496813

C,0,-1.5635871636,1.196670964,0.0001674351

C,0,-0.1878100423,1.2471167783,0.0000080162

C,0,0.6021935777,0.0596970861,-0.0000506649

N,0,-0.1300723912,-1.1106608658,-0.000004901

S,0,2.3014442735,0.0067413139,-0.0002333198

H,0,0.4056484459,-1.9737225466,-0.0000791235

H,0,0.3367282812,2.1948675308,-0.0000654221

H,0,-1.9048530268,-2.1882429629,0.0001795301

H,0,-3.324727471,-0.1039844144,0.0003792017

H,0,-2.1343025655,2.1207547602,0.0002303912

B3LYP/6-31G(d) SCIPCM e=4.81

C,0,-1.4885226041,-1.1889337577,0.0001460149

C,0,-2.2431624523,-0.0473082414,0.0002570908

C,0,-1.5627460354,1.1966615626,0.0001718869

C,0,-0.1884893512,1.2486693393,0.0000173671

C,0,0.6052691068,0.061045577,-0.0000021462

N,0,-0.1290513742,-1.1102940851,0.0000077521

S,0,2.2989922715,0.0062458787,-0.0002628335

H,0,0.4120566299,-1.9696775533,-0.0000798967

H,0,0.3366047132,2.1961209438,-0.0000740889

H,0,-1.9041591604,-2.1891545543,0.0001655695

H,0,-3.3243866251,-0.1061141239,0.0003765531

H,0,-2.134724264,2.1201429455,0.0002216528

B3LYP/6-31G(d) SCIPCM e=2.28

C,0,-1.4879294207,-1.1892664776,0.0001544345

C,0,-2.2429604554,-0.0491934081,0.000246877

C,0,-1.5618516116,1.1966033677,0.000171981

C,0,-0.1892362071,1.2502068019,0.0000177324

C,0,0.6092110571,0.0626600228,-0.0000637806

N,0,-0.1281583459,-1.1100945902,0.0000028311

S,0,2.2963558483,0.005717275,-0.0002423577

H,0,0.4185190939,-1.9656388118,-0.0000642119

H,0,0.3366907458,2.1972789123,-0.0000430967

H,0,-1.9034921696,-2.189958413,0.0001944829

H,0,-3.3243005398,-0.1078766112,0.0003700011

H,0,-2.1354024555,2.1193188148,0.0002372646

B3LYP/6-31G(d) Onsager 46.68 A0=4.24

C,0,-1.4877783433,-1.1902620667,0.000159707

C,0,-2.2455916897,-0.051993685,0.0002443438

C,0,-1.5664246125,1.1930588808,0.000174248

C,0,-0.1921914122,1.2500390321,0.0000223533

C,0,0.6082219521,0.0666288245,-0.0000798738

N,0,-0.126842128,-1.1055920757,0.0000066744

S,0,2.3004869765,0.0052440433,-0.0002441659

H,0,0.4258455775,-1.9567595735,-0.0000535697

H,0,0.3313512101,2.1985397452,-0.0000268041

H,0,-1.9032877258,-2.1914150751,0.0002061526

H,0,-3.3268877954,-0.1130855902,0.0003654407

H,0,-2.1443333614,2.1131344162,0.0002440437

B3LYP/6-31G(d) Onsager 18.30 A0=4.24

C,0,-1.4875847761,-1.1903607026,0.000158884

C,0,-2.2452470791,-0.0520617302,0.0002477885

C,0,-1.5660439329,1.193301728,0.0001763679

C,0,-0.1921039785,1.2502972097,0.0000258272

C,0,0.6084813374,0.0665937565,-0.0000559702

N,0,-0.1267352408,-1.1058464521,0.0000122178

S,0,2.2998663914,0.0052339709,-0.0002573165

H,0,0.4260455243,-1.9569831534,-0.0000544776

H,0,0.3315763664,2.1987388601,-0.0000338393

H,0,-1.9029673819,-2.1915719891,0.0001977323

H,0,-3.3265262699,-0.1130833959,0.0003644254

H,0,-2.1438532403,2.1134597409,0.0002403137

B3LYP/6-31G(d) Onsager 4.81 A0=4.24

C,0,-1.4874654688,-1.1901498095,0.000158527

C,0,-2.2444122877,-0.052005557,0.000247186

C,0,-1.5644298934,1.1943369442,0.0001754009

C,0,-0.1915514902,1.2508551285,0.0000244689

C,0,0.6102110213,0.0658695097,-0.0000604596

N,0,-0.1265869677,-1.1069866413,0.0000099748

S,0,2.297639121,0.0052115125,-0.0002534757

H,0,0.42684646,-1.9576972361,-0.0000553926

H,0,0.3331340224,2.1987259098,-0.0000336699

H,0,-1.9030740142,-2.1913301035,0.0001984976

H,0,-3.3256860612,-0.1126741418,0.0003655053

H,0,-2.1414488564,2.1150605652,0.0002401067

B3LYP/6-31G(d) Onsager 2.28 A0=4.24

C,0,-1.4834153304,-1.188642102,0.0001589645

C,0,-2.2403244116,-0.0521843885,0.0002454779

C,0,-1.5603921998,1.1949119047,0.0001746916

C,0,-0.1895697239,1.2509439147,0.000024076

C,0,0.6104705988,0.0641218078,-0.0000690008

N,0,-0.1250816354,-1.1079561539,0.0000089587

S,0,2.2903508037,0.0055543118,-0.0002494188

H,0,0.4283615428,-1.9570391895,-0.0000544322

H,0,0.3373252172,2.1964498217,-0.0000302848

H,0,-1.8997768289,-2.1885709479,0.000202008

H,0,-3.3202365884,-0.1141445405,0.0003640022

H,0,-2.1363283528,2.1152221246,0.00024144

--------------------------------------------------

Thioimidate 2a liquid-phase

--------------------------------------------------

B3LYP/6-31G(d) SCIPCM 46.68

C,0,-1.175937323,-1.4923390219,0.

C,0,-0.0144730019,-2.2601505351,0.

C,0,1.2135102385,-1.5926708767,0.

C,0,1.2306873824,-0.2018981658,0.

C,0,0.,0.4713363523,0.

N,0,-1.1825542923,-0.1491943944,0.

H,0,2.1657970817,0.3489784124,0.

S,0,0.0005652797,2.2641674722,0.

H,0,-1.3413144296,2.3837972519,0.

H,0,-2.1544119608,-1.9686111583,0.

H,0,-0.0705408174,-3.3435179658,0.

H,0,2.146581921,-2.1486318507,0.

B3LYP/6-31G(d) SCIPCM 18.30

C,0,-1.1785609298,-1.490186616,0.

C,0,-0.0183370894,-2.2597823232,0.

C,0,1.2107137008,-1.5943276762,0.

C,0,1.2297992711,-0.2036642582,0.

C,0,0.,0.4712921126,0.

N,0,-1.1835978141,-0.1470524401,0.

H,0,2.1658512138,0.3456387346,0.

S,0,0.0053185384,2.2636129156,0.

H,0,-1.3364129596,2.3849090475,0.

H,0,-2.1579507609,-1.964512918,0.

H,0,-0.0762440557,-3.3430829222,0.

H,0,2.1431549296,-2.1513789452,0.

B3LYP/6-31G(d) SCIPCM 4.81

C,0,-1.1783670732,-1.4895491889,0.

C,0,-0.0183725165,-2.2594696776,0.

C,0,1.2106674251,-1.5941618397,0.

C,0,1.2298313465,-0.2037309179,0.

C,0,0.,0.4714921454,0.

N,0,-1.1832162521,-0.1469180128,0.

H,0,2.1658037991,0.3458383794,0.

S,0,0.0051467114,2.2631365354,0.

H,0,-1.3368337173,2.382685797,0.

H,0,-2.1580214239,-1.963449822,0.

H,0,-0.0764532962,-3.3428648291,0.

H,0,2.1431159291,-2.1514511301,0.

B3LYP/6-31G(d) SCIPCM 2.28

C,0,-1.1748690031,-1.4909306264,0.

C,0,-0.013810645,-2.259418517,0.

C,0,1.2139383029,-1.5918177804,0.

C,0,1.2309414211,-0.2016623352,0.

C,0,0.,0.4722521599,0.

N,0,-1.1813989933,-0.1491899636,0.

H,0,2.1657826843,0.350001502,0.

S,0,-0.0008025055,2.2628757517,0.

H,0,-1.3436369315,2.3744896545,0.

H,0,-2.1542076663,-1.9658251033,0.

H,0,-0.0698624998,-3.3430278365,0.

H,0,2.1473569987,-2.1478579048,0.

B3LYP/6-31G(d) Onsager 46.68 A0=4.16

C,0,-1.1696720923,-1.4927418642,0.

C,0,-0.0068357448,-2.2585700842,0.

C,0,1.2191415892,-1.588601075,0.

C,0,1.2326082361,-0.1982699255,0.

C,0,0.,0.4710197378,0.

N,0,-1.1796975515,-0.1513977299,0.

H,0,2.166128921,0.3559051654,0.

S,0,-0.0094540211,2.2628091542,0.

H,0,-1.3540923667,2.3568827295,0.

H,0,-2.1480345505,-1.9696624644,0.

H,0,-0.0598775883,-3.342333211,0.

H,0,2.1535708537,-2.1429753108,0.

B3LYP/6-31G(d) Onsager 18.30 A0=4.16

C,0,-1.1696720923,-1.4927418642,0.

C,0,-0.0068357448,-2.2585700842,0.

C,0,1.2191415892,-1.588601075,0.

C,0,1.2326082361,-0.1982699255,0.

C,0,0.,0.4710197378,0.

N,0,-1.1796975515,-0.1513977299,0.

H,0,2.166128921,0.3559051654,0.

S,0,-0.0094540211,2.2628091542,0.

H,0,-1.3540923667,2.3568827295,0.

H,0,-2.1480345505,-1.9696624644,0.

H,0,-0.0598775883,-3.342333211,0.

H,0,2.1535708537,-2.1429753108,0.

B3LYP/6-31G(d) Onsager 4.81 A0=4.16

C,0,-1.1711646289,-1.4916546746,0.

C,0,-0.0090638835,-2.2585671078,0.

C,0,1.217445956,-1.5895317504,0.

C,0,1.2320638296,-0.1993215866,0.

C,0,0.,0.4714451034,0.

N,0,-1.1800915194,-0.1504735554,0.

H,0,2.1659769106,0.3541828916,0.

S,0,-0.0067554774,2.2625034043,0.

H,0,-1.3511930591,2.3593729589,0.

H,0,-2.1500817019,-1.967599524,0.

H,0,-0.0632022211,-3.3423313769,0.

H,0,2.1515407078,-2.1445844355,0.

B3LYP/6-31G(d) Onsager 2.28 A0=4.16

C,0,-1.1805203441,-1.4838111127,0.

C,0,-0.0228938683,-2.255809704,0.

C,0,1.2063878832,-1.5931269816,0.

C,0,1.2273421829,-0.2045170858,0.

C,0,0.,0.4744201618,0.

N,0,-1.179890505,-0.1442671101,0.

H,0,2.1628424847,0.3441136774,0.

S,0,0.009452826,2.2574585615,0.

H,0,-1.3296922768,2.3668900867,0.

H,0,-2.1609415282,-1.9536936817,0.

H,0,-0.0831703698,-3.338062074,0.

H,0,2.1370548875,-2.1516468875,0.

--------------------------------------------------

Thioimidate 2b liquid-phase

--------------------------------------------------

B3LYP/6-31G(d) SCIPCM 46.68

C,0,1.4683343987,-1.2129662192,0.0000229478

C,0,2.2600092555,-0.0668241021,0.0000151017

C,0,1.6177153443,1.1735241062,-0.0000037548

C,0,0.2264435244,1.2213945736,-0.0000073069

C,0,-0.4710477402,0.004659146,-0.0000194895

N,0,0.1270719683,-1.1904376584,-0.0000043986

H,0,-0.2985802414,2.1706880109,0.0000033725

S,0,-2.2595239029,-0.0959339638,-0.0000118176

H,0,-2.5060312694,1.2286878327,0.000097164

H,0,1.9247665303,-2.2008309201,0.0000522297

H,0,3.3420094883,-0.144755075,0.0000251054

H,0,2.1919854647,2.0954921541,-0.0000029884

B3LYP/6-31G(d) SCIPCM 18.30

C,0,-1.4679429373,-1.2130045682,0.0000619044

C,0,-2.2599031909,-0.0670318798,0.000102202

C,0,-1.6178510759,1.1733742185,0.0000593163

C,0,-0.2266400124,1.2213606258,-0.0000143581

C,0,0.4710851222,0.004719384,-0.0000047732

N,0,-0.1268503055,-1.1903030114,0.0000247579

H,0,0.2982781944,2.1707421832,-0.0000854657

S,0,2.2594185149,-0.0958383219,-0.0001286219

H,0,2.5047027655,1.2291772866,0.0004211835

H,0,-1.9240124936,-2.2010378262,0.0000761744

H,0,-3.3419202624,-0.1451446255,0.0001655497

H,0,-2.1922797384,2.0952905301,0.0000814551

B3LYP/6-31G(d) SCIPCM 4.81

C,0,-1.4667615942,-1.2130925367,0.0001786411

C,0,-2.2597066766,-0.0676424448,0.000261606

C,0,-1.6182138849,1.1728506691,0.0001502071

C,0,-0.227240485,1.2211984152,-0.0000213489

C,0,0.471450992,0.004852719,0.0000112508

N,0,-0.1264543221,-1.1896057657,0.0000751245

H,0,0.2973316161,2.1709113523,-0.0001796903

S,0,2.2591323072,-0.0956249949,-0.0003576655

H,0,2.5010779734,1.2306214674,0.0010941841

H,0,-1.9216565318,-2.2017303227,0.000243799

H,0,-3.3417966231,-0.1462486439,0.000388159

H,0,-2.1930632036,2.0946854938,0.0001681881

B3LYP/6-31G(d) SCIPCM 2.28

C,0,-1.4654424433,-1.2131824492,0.0001773205

C,0,-2.2595081878,-0.0683923777,0.0001898206

C,0,-1.6185986932,1.1722263078,0.000087606

C,0,-0.2279433474,1.2210775389,-0.0000638556

C,0,0.4719470027,0.00504704,-0.000205722

N,0,-0.1260145559,-1.1887418007,-0.0000265551

H,0,0.2962245523,2.1711585949,-0.0000746314

S,0,2.2587906746,-0.0954156481,-0.0001504586

H,0,2.4971496085,1.2321258605,0.0008428139

H,0,-1.9189912402,-2.2025372425,0.0002493858

H,0,-3.3416730236,-0.1474842482,0.0003104645

H,0,-2.1939847858,2.0939236505,0.0001541736

--------------------------------------------------

--------------------------------------------------

Dimerized Thioamide 1 gas-phase

--------------------------------------------------

HF/3-21G*

N,0,0.000000,0.000000,0.000000

C,0,0.000000,0.000000,1.352520

C,0,1.285673,0.000000,1.961741

C,0,2.413131,0.000000,1.208744

C,0,2.342455,0.000000,-0.205030

C,0,1.117807,0.000000,-0.769222

S,0,-1.444269,0.000000,2.244157

C,0,1.318889,0.000000,3.028614

H,0,3.372632,0.000000,1.686222

H,0,3.224543,0.000000,-0.807077

H,0,0.950845,0.000000,-1.824800

H,0,-0.892843,0.000000,-0.481223

N,0,-4.098449,0.002591,0.088206

C,0,-4.098730,0.002297,-1.264314

C,0,-5.384528,0.003758,-1.873268

C,0,-6.511829,0.005319,-1.120038

C,0,-6.440860,0.005538,0.293721

C,0,-5.216096,0.004142,0.857660

S,0,-2.654647,0.000314,-2.156250

H,0,-5.417966,0.003568,-2.940135

H,0,-7.471428,0.006404,-1.597318

H,0,-7.322822,0.006761,0.895951

H,0,-5.048915,0.004164,1.913202

H,0,-3.205507,0.001589,0.569243

B3LYP/3-21G*

N,0,1.927605,0.538407,-0.000119

C,0,2.231510,-0.810557,-0.000251

C,0,3.628784,-1.114782,0.000120

C,0,4.580091,-0.122820,0.000270

C,0,4.198709,1.243416,0.000221

C,0,2.860176,1.533704,0.000073

S,0,1.025423,-2.005214,-0.000162

H,0,3.900578,-2.160423,0.000210

H,0,5.631853,-0.384432,0.000457

H,0,4.932898,2.035595,0.000369

H,0,2.468357,2.542036,0.000088

H,0,0.923842,0.828401,-0.000192

N,0,-1.927605,-0.538406,-0.000114

C,0,-2.231510,0.810558,-0.000253

C,0,-3.628784,1.114782,0.000108

C,0,-4.580091,0.122819,0.000261

C,0,-4.198708,-1.243417,0.000223

C,0,-2.860175,-1.533704,0.000080

S,0,-1.025424,2.005215,-0.000171

H,0,-3.900579,2.160422,0.000189

H,0,-5.631853,0.384430,0.000442

H,0,-4.932896,-2.035596,0.000373

H,0,-2.468355,-2.542036,0.000103

H,0,-0.923841,-0.828399,-0.000182
